# Supplementary material for: Influence of Pre-Dispersion Media on the Batch Reactor Dissolution Behavior of Al2O3 Coated TiO2 (NM-104) and Two ZnO (NM-110 and NM-111) Nanomaterials in Biologically Relevant Test Media
Source: Nanomaterials (Basel). 2022 Feb 7;12(3):566. doi: 10.3390/nano12030566 (PMC8840498; doi:10.3390/nano12030566)
Supplement: Supplementary file 1 [file nanomaterials-12-00566-s001.zip › nanomaterials-1435596-supplementary.pdf]

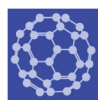

## Supplementary materials

# Influence of Pre-Dispersion Media on the Batch Reactor Dissolution Behavior of Al<sub>2</sub>O<sub>3</sub> Coated TiO<sub>2</sub> (NM-104) and Two ZnO (NM-110 and NM-111) Nanomaterials in Biologically Relevant Test Media

Else Holmfred <sup>1,2,\*</sup>, Jens J. Sloth <sup>2</sup>, Katrin Loeschner <sup>2</sup>, and Keld Alstrup Jensen <sup>1,\*</sup>

<sup>1</sup> National Research Center for the Working Environment, 2100 Copenhagen, Denmark

<sup>2</sup> Research Group for Analytical Food Chemistry, Division of Food Technology, National Food Institute, Technical University of Denmark, 2800 Kongens Lyngby, Denmark; jjsl@food.dtu.dk (J.J.S.); kals@food.dtu.dk (K.L.)

\* Correspondence: elshol@food.dtu.dk (E.H.); kaj@nfa.dk (K.A.J.)

**Citation:** Holmfred, E.; Sloth, J.J.; Loeschner, K.; Jensen, K.A. Influence of Pre-Dispersion Media on the Batch Reactor Dissolution Behavior of Al<sub>2</sub>O<sub>3</sub> Coated TiO<sub>2</sub> (NM-104) and Two ZnO (NM-110 and NM-111) Nanomaterials in Biologically Relevant Test Media. *Nanomaterials* **2022**, *12*, 566. <https://doi.org/10.3390/nano12030566>

Academic Editor: Andrea Hartwig

Received: 9 October 2021

Accepted: 30 January 2022

Published: 7 February 2022

**Publisher's Note:** MDPI stays neutral with regard to jurisdictional claims in published maps and institutional affiliations.

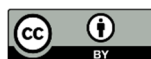

**Copyright:** © 2022 by the authors. Licensee MDPI, Basel, Switzerland. This article is an open access article distributed under the terms and conditions of the Creative Commons Attribution (CC BY) license (<https://creativecommons.org/licenses/by/4.0/>).

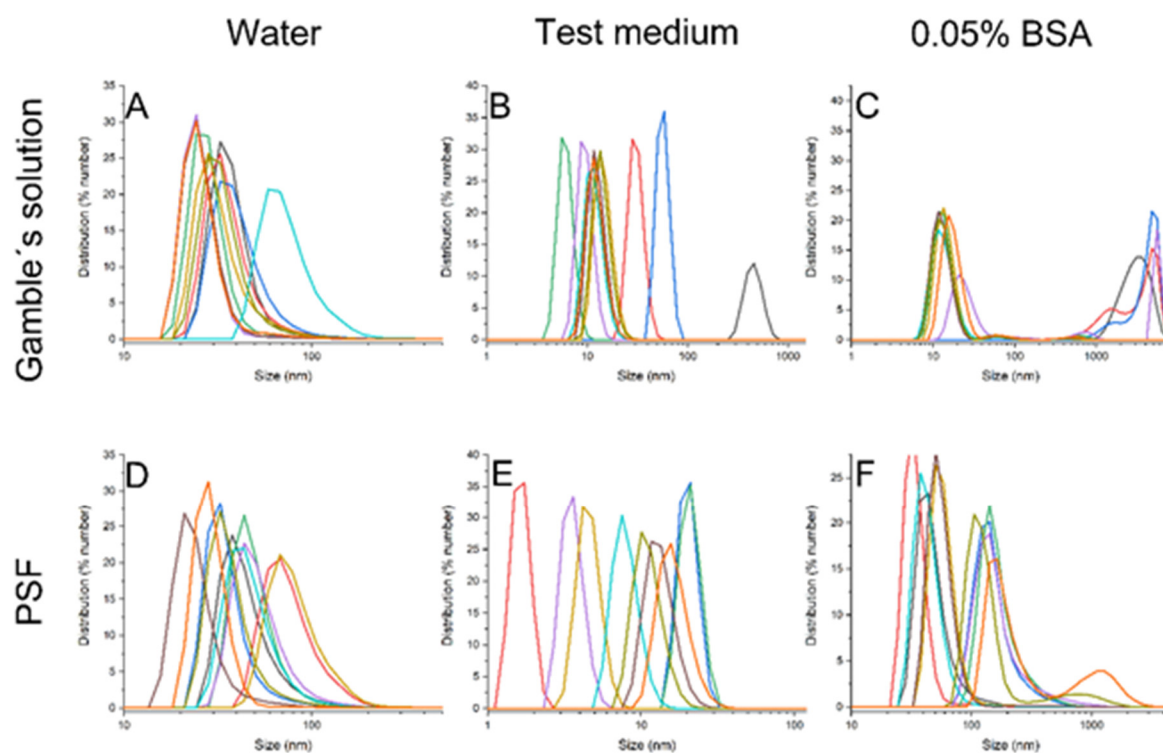

**Figure S1.** Hydrodynamic size distribution of TiO<sub>2</sub> (NM-104). Dispersed in (A) water; (B) low-calcium Gamble's solution; (C) 0.05% BSA; (D) water; (E) phagolysosomal simulant fluid (PSF); (F) 0.05% BSA. The dissolution behavior A-C was further tested in low-calcium Gamble's solution and D-F in PSF.

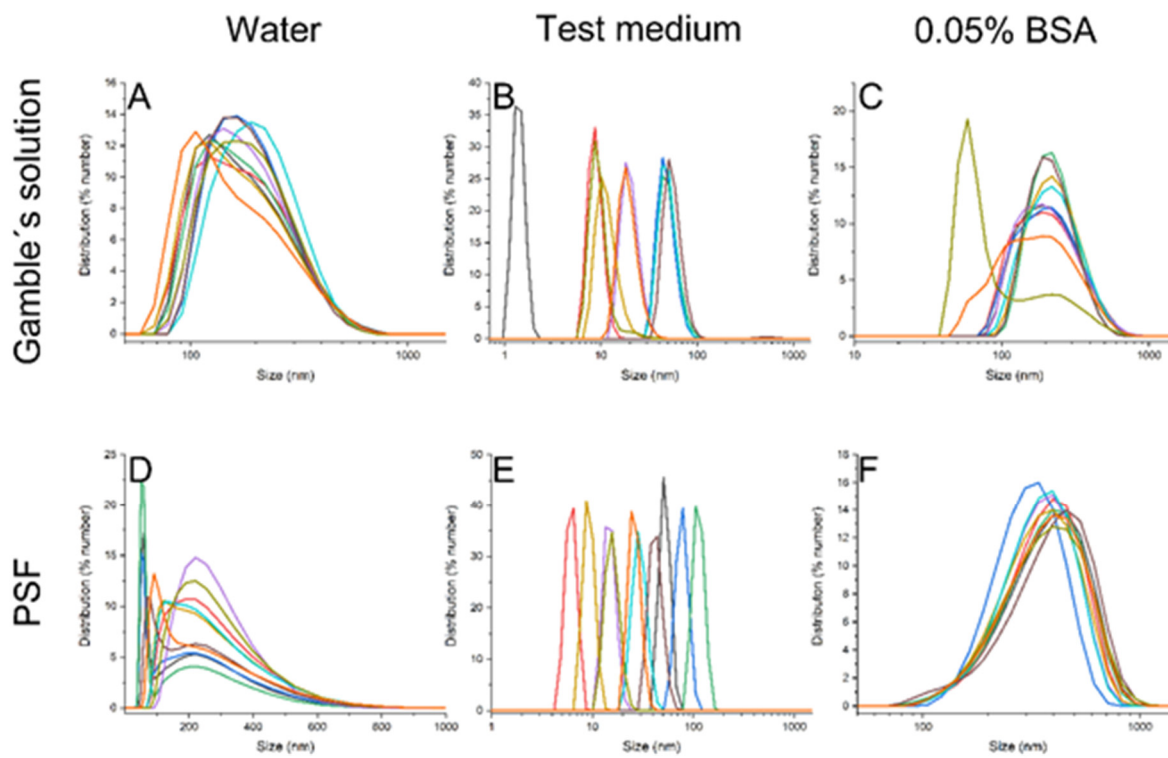

**Figure S2.** Hydrodynamic size distribution of ZnO (NM-110). Dispersed in (A) water; (B) low-calcium Gamble's solution; (C) 0.05% BSA; (D) water; (E) phagolysosomal simulant fluid (PSF); (F) 0.05% BSA. The dissolution behavior A-C was further tested in low-calcium Gamble's solution and D-F in PSF.

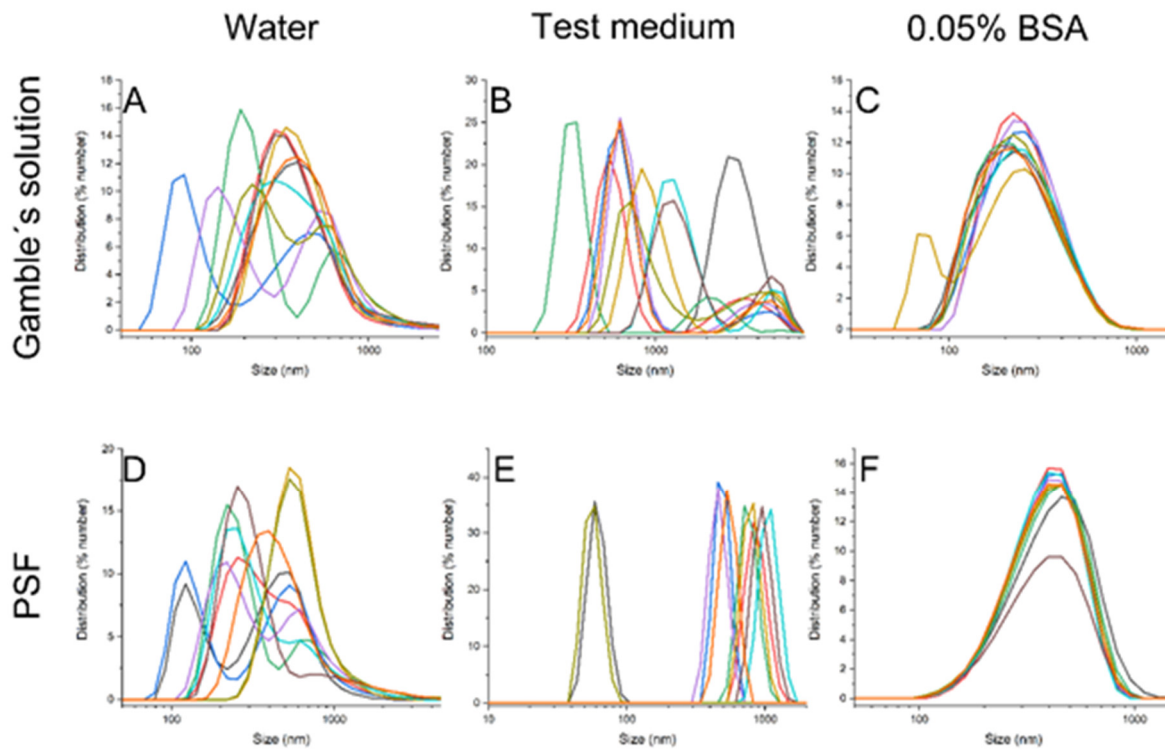

**Figure S3.** Hydrodynamic size distribution of ZnO (NM-111). Dispersed in (A) water; (B) low-calcium Gamble's solution; (C) 0.05% BSA; (D) water; (E) phagolysosomal simulant fluid (PSF); (F) 0.05% BSA. The dissolution behavior A-C was further tested in low-calcium Gamble's solution and D-F in PSF.
